# Supplementary material
Source: PubMed Central journal article supplement (PMC3340208)

# Supplemental Fig.1

## A

### ENStem Cells

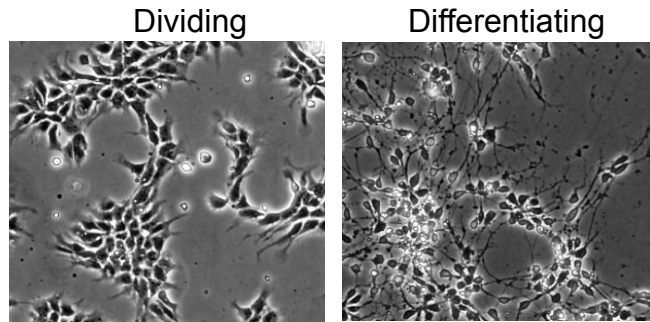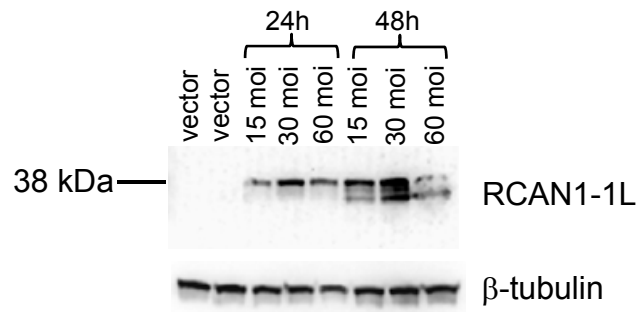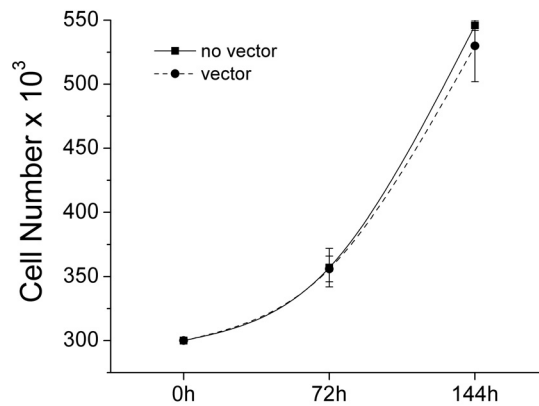

## B

### ST14A Cells

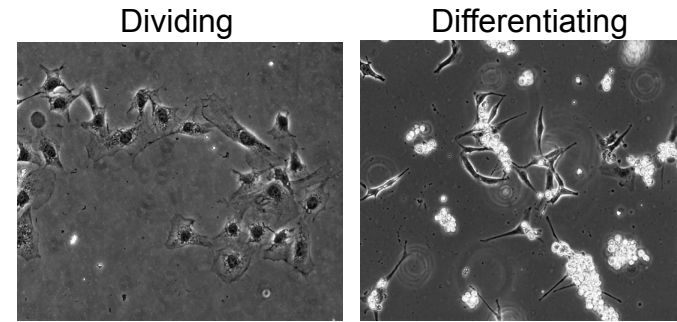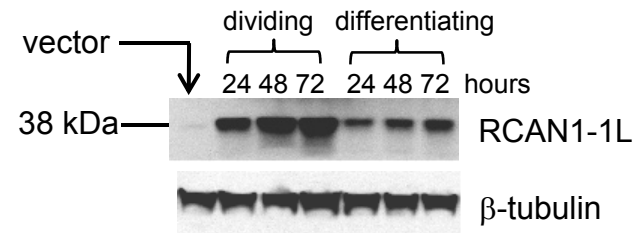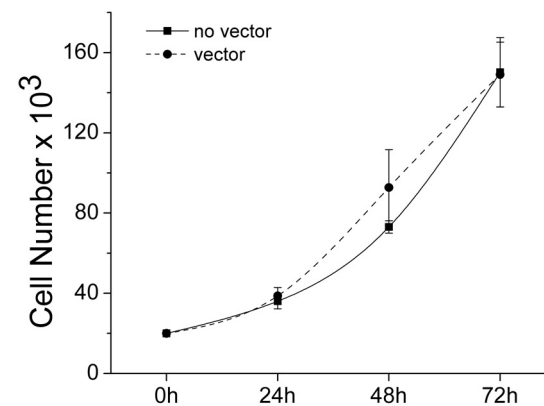

## Supplemental Fig.2

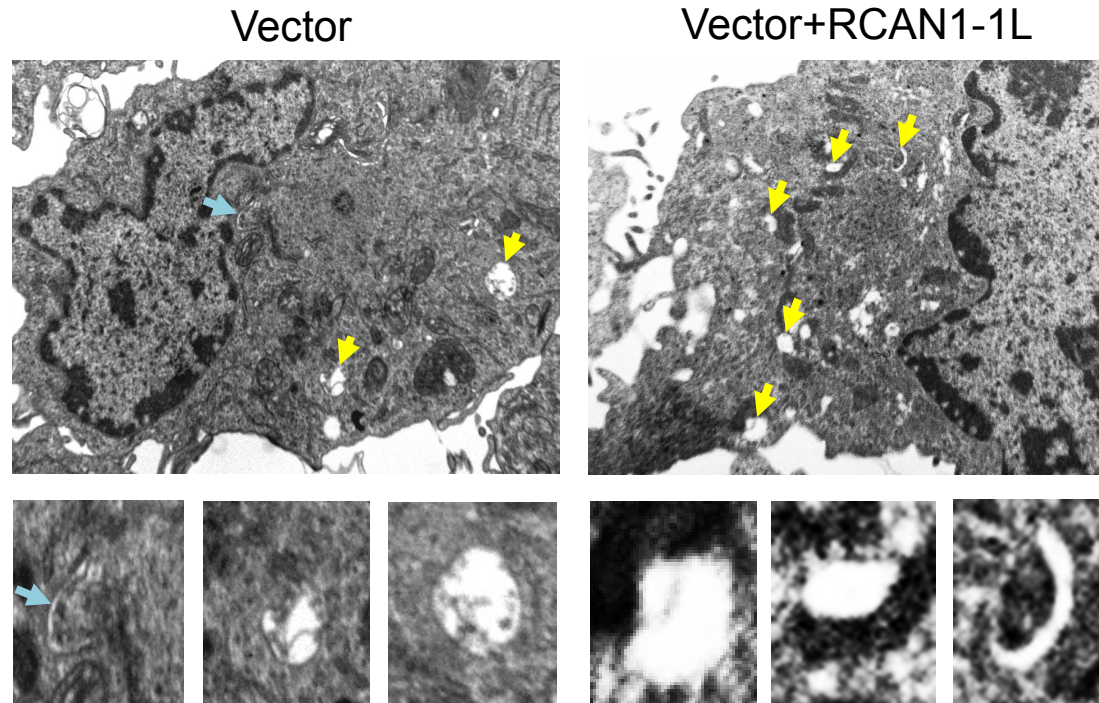

Autophagosomes are shown by yellow arrows. The blue arrow shows a forming autophagosome (phagophore).

# Supplemental Fig. 3

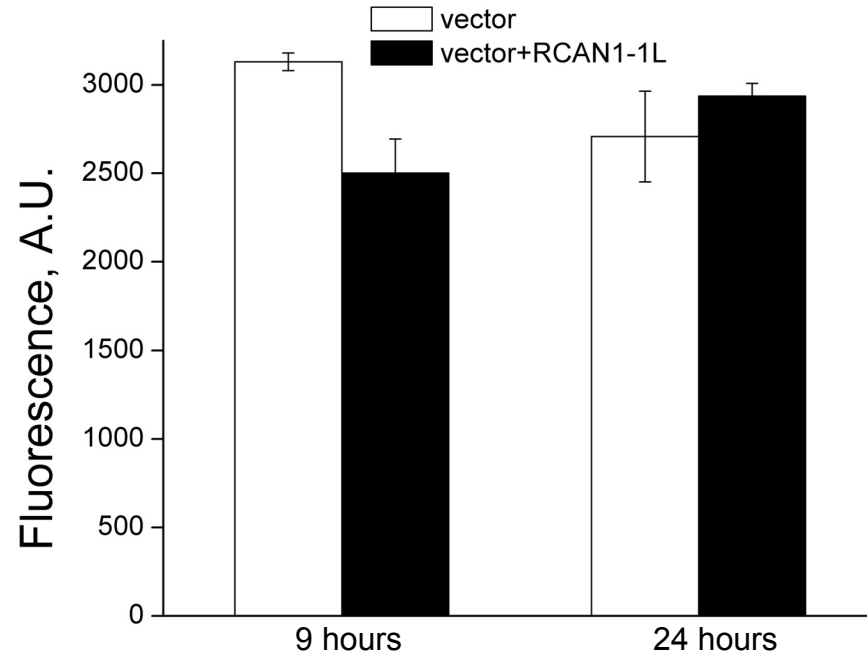

# Supplemental Fig. 4

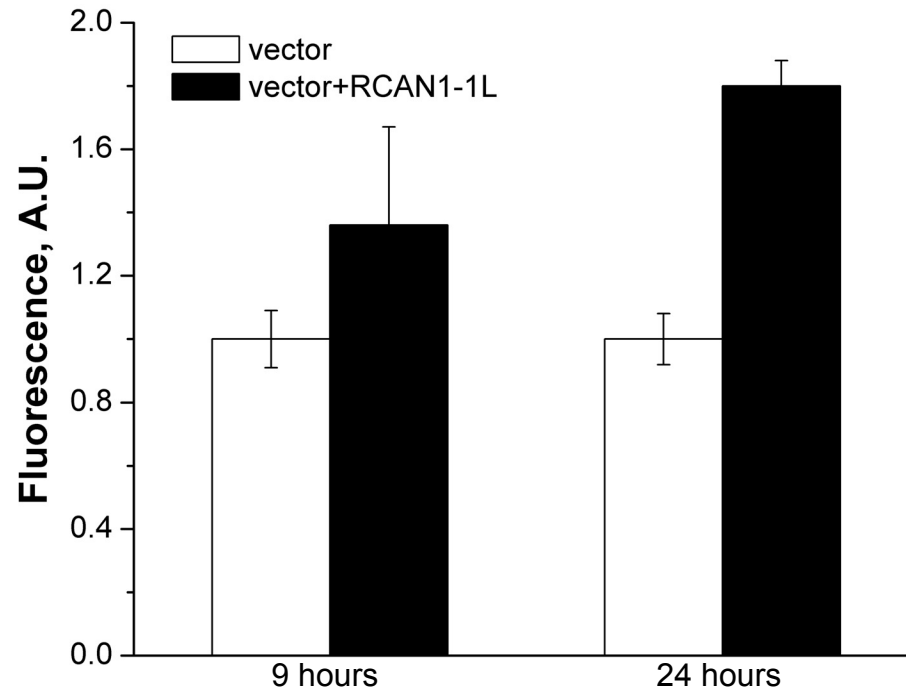

Supplement: supp_M111.305342_jbc.M111.305342-1.pdf [file supp_M111.305342_jbc.M111.305342-1.pdf]
